# Supplementary material for: Proteomics applied to the authentication of fish glue: application to a 17th century artwork sample
Source: Royal Society of Chemistry journal article supplement (doi:10.1039/c3an00786c), 2013-01-01
Supplement: c3an00786c.pdf [file c3an00786c.pdf]

| Protein names                         | Taxonomy          | Protein accession numbers | Scores | Sequence coverages (%) | Specific-peptides |                   |                  |           |                                   |               |
|---------------------------------------|-------------------|---------------------------|--------|------------------------|-------------------|-------------------|------------------|-----------|-----------------------------------|---------------|
|                                       |                   |                           |        |                        | Theoretical mass  | Experimental mass | $\Delta m$ (ppm) | Positions | Sequences                         | Modifications |
| Collagen alpha-2(I) chain precursor   | <i>Bos taurus</i> | NP_776945.1               | 885    | 24                     | 1647.8217         | 1647.8233         | 1                | 380-397   | GSTGEIGPAGPPGPPGLR                | 2 oxidations  |
|                                       |                   |                           |        |                        | 1426.7205         | 1426.7202         | 0                | 572-586   | GIPGEFGLPGPAGAR                   | 2 oxidations  |
|                                       |                   |                           |        |                        | 2134.0291         | 2134.0333         | 2                | 620-643   | GEPGVVGAPGTAGPSGPSGLPGER          | 2 oxidations  |
|                                       |                   |                           |        |                        | 3016.5154         | 3016.5063         | -3               | 845-877   | GPSGEPGTAGPPGTPGPQGLLGAPGFLGLPGSR | 4 oxidations  |
|                                       |                   |                           |        |                        | 1531.7743         | 1531.7768         | 2                | 977-994   | GEPGPAGAVGPAGAVGPR                | 1 oxidation   |
|                                       |                   |                           |        |                        | 1191.6724         | 1191.6709         | -1               | 1066-1078 | IGQPGAVGPAGIR                     |               |
| Collagen alpha-1(III) chain precursor | <i>Bos taurus</i> | NP_001070299.1            | 335    | 8                      | 1692.854          | 1692.8561         | 1                | 519-536   | GVAGEPGRDGLPGGPGLR                | 2 oxidations  |
|                                       |                   |                           |        |                        | 1352.669          | 1352.6692         | 1                | 780-794   | GESGAPGVPGIAGPR                   | 2 oxidations  |

ESI\_1: Detailed data for bovine-specific peptides
