# Supplementary material for: Proteomics applied to the authentication of fish glue: application to a 17th century artwork sample
Source: Royal Society of Chemistry journal article supplement (doi:10.1039/c3an00786c), 2013-01-01
Supplement: c3an00786c_2.pdf [file c3an00786c_2.pdf]

| Protein names                                                                    | Taxonomy                       | Protein accession numbers | Positions | Sequences      | Theoretical mass | Experimental mass | $\Delta m$ (ppm) | Modifications |
|----------------------------------------------------------------------------------|--------------------------------|---------------------------|-----------|----------------|------------------|-------------------|------------------|---------------|
| Collagen type I alpha 1                                                          | <i>Ctenopharyngodon idella</i> | ADK35755.1                | 239-250   | GFPGTPGLPGIK   | 1187.6187        | 1187.6175         | -1               | 3 oxidations  |
| Collagen type II alpha 1b                                                        | <i>Petromyzon marinus</i>      | ABB53638.2                | 250-263   | GFPGLPGPAGEPGK | 1327.6409        | 1327.6402         | 0                | 3 oxidations  |
| Unnamed protein product *                                                        | <i>Tetraodon nigroviridis</i>  | CAG11560.1                | 291-300   | AGLPGLRGDK     | 1014.5458        | 1014.5448         | -1               | 2 oxidations  |
| Novel protein similar to vertebrate collagen. type VI. alpha 3 (COL6A3). partial | <i>Danio rerio</i>             | CAX15447.1                | 1073-1084 | GPAGPIGAPGVR   | 1047.5825        | 1047.5835         | 1                |               |
| Type I collagen alpha 2 chain                                                    | <i>Oncorhynchus keta</i>       | BAB79229.1                | 477-488   | GQPGNIGFPGPK   | 1199.5935        | 1199.5911         | -2               | 2 oxidations  |
| Collagen alpha-2(I) chain-like isoform 1                                         | <i>Oreochromis niloticus</i>   | XP_003457295.1            | 887-896   | LGPAGPPGAR     | 891.4563         | 891.4572          | 1                |               |
| Collagen alpha-2(VI) chain                                                       | <i>Danio rerio</i>             | XP_696164.2               | 375-387   | SGPPGPAGDPGPK  | 1164.5411        | 1164.5434         | 2                | 2 oxidations  |

\* presents collagen domains using InterProScan software, more details are given in the experimental section

ESI\_2: Experimental results obtained for the fish-specific peptides.
